# Supplementary material
Source: PubMed Central journal article supplement (PMC5760166)
Supplement: NIHMS929869-supplement-Supp_info.pdf [file NIHMS929869-supplement-Supp_info.pdf]

*Supporting Information*

**Misunderstanding the Preorganization Concept can lead to Confusions about the**

**Origin of Enzyme Catalysis**

Origin of Enzyme Catalysis

Garima Jindal and Arieh Warshel\*

Department of Chemistry, University of Southern California, 3620 McClintock Avenue, Los Angeles, California 90089, United States

## EVB Simulations

We calculated the activation energies of systems **I-V** given in the main text using our empirical valence bond (EVB)<sup>1-3</sup> and free energy perturbation/umbrella sampling (FEP/US) approach.<sup>4</sup> The calculations were performed using MOLARIS software with the ENZYMIK force field.<sup>5</sup> The EVB method has been widely used by our group and others and below we provide a concise description of the method. The system is divided into the EVB region and rest of the protein. The classical forcefield ENZYMIK is used to simulate the remaining protein whereas the EVB region is treated using a quantum empirical valence bond forcefield. The reaction is simulated from the reactant state to the product state which represent the two diabatic states. The ground state is obtained by mixing the two diabatic states.

In the EVB forcefield, the bonded atoms are defined using a Morse potential. For a two diabatic state system, ground state potential is:

$$Eg = c_1^2 \varepsilon_1 + c_2^2 \varepsilon_2 + 2(c_1^2 c_2^2)^{1/2} H_{12} \quad (S1)$$

$\varepsilon_1$  and  $\varepsilon_2$  are the potential of the two diabatic states.

The coefficients are determined by diagonalizing the matrix,

$$H = \begin{pmatrix} \varepsilon_1 & H_{12} \\ H_{12} & \varepsilon_2 \end{pmatrix} \quad (S2)$$

The mixing term  $H_{12}$  is:

$$H_{12} = A \exp\{-\mu R\} \quad (S3)$$

where, A and  $\mu$  are empirical constants that are calibrated using experimental free energy. These parameters are considered to be same in the protein and the reference state. To simulate the bond formation/breaking between two EVB states, simulations are carried out on a mapping potential which is as follows:

$$\varepsilon_m = (1 - \lambda_m) \varepsilon_1 + \lambda_m \varepsilon_2 \quad (0 \leq \lambda_m \leq 1) \quad (S4)$$

where,  $\lambda_m$  is a parameter that is changed from 0 to 1 in N+1 windows. The Free Energy perturbation (FEP) is used to calculate the free energy change between two consecutive steps:

$$\Delta G_{m \rightarrow m+1} = -\beta^{-1} \ln \langle e^{\{-\beta[\varepsilon_m(\lambda_{m+1}) - \varepsilon_m(\lambda_m)]\}} \rangle_m \quad (S5)$$

$\langle \rangle_m$  represents an average over different configurations when system moves on the  $\varepsilon_m$  potential.

The activation free energy is calculated using the free energy functional that represents the adiabatic ground state surface:

$$\Delta g(x') = \sum_{m=0}^{i-1} \Delta G_{m \rightarrow m+1} - \beta^{-1} \ln \left\langle \delta(x - x') e^{-\beta[E_g - \varepsilon_m(\lambda_i)]} \right\rangle_{\varepsilon_m} \quad (\text{S6})$$

where,  $\sum_{m=0}^{i-1} \Delta G_{m \rightarrow m+1}$  = Free energy difference between the first and  $i^{\text{th}}$  mapping potential,  $E_g$  = Energy of the ground state and  $\delta$  = Dirac delta function and the inner broken brackets.

For the current study, we considered a similar mechanism as given in Ref. <sup>6</sup>. The EVB surface is generated using a two state diabatic model, where the two states represent the reactant state (RS) and the transition state (TS). The method of representing the TS as a minimum has been previously used by our group and is described in detail in Ref. <sup>7</sup>. The RS and TS were first subjected to geometry optimization at the M06-2X/6-311+G\*\* level of theory using Gaussian09 software.<sup>8</sup> The geometric parameters obtained using the quantum approach were used to define our EVB parameters. The electrostatic potential charges (ESP) charges for the two diabatic states that represent the RS and TS were also calculated using the M06-2X level of theory at the 6-311+G\*\* basis set. The EVB region was treated as the center of the system which was immersed in an 18Å water sphere using the surface constrained all atom solvent (SCAAS) model.<sup>9</sup> Local reaction field (LRF) was used to treat the long range effects.<sup>10</sup> The different systems were first relaxed by heating the system from 30K to 300K for 100 ps. Three different starting structures were generated from this relaxation and were used for the FEP simulation which involved 31 frames where each frame was simulated for 20 ps with a time step of 1 fs. The atom numbering scheme is provided in Figure S1 and the EVB parameters are given in Tables S1a-g.

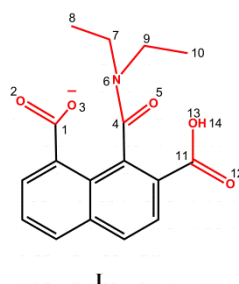

**Figure S1.** Atom numbering scheme for system **I** for EVB region which is shown in red

**Table S1.** EVB parameters

**a-** Atomic Charges for the Reactant and Transition State

| Atom | Atom Name | RS     | TS     |
|------|-----------|--------|--------|
| 1    | C         | 0.970  | 1.075  |
| 2    | O         | -0.922 | -0.791 |
| 3    | O         | -0.865 | -0.801 |
| 4    | C         | 0.307  | 1.031  |
| 5    | O         | -0.642 | -0.911 |
| 6    | N         | 0.101  | -0.295 |
| 7    | C         | 0.089  | 0.064  |
| 8    | C         | -0.346 | -0.278 |
| 9    | C         | 0.174  | 0.195  |
| 10   | C         | -0.310 | -0.419 |
| 11   | C         | 0.795  | 0.885  |
| 12   | O         | -0.663 | -0.722 |
| 13   | O         | -0.599 | -0.723 |
| 14   | H         | 0.489  | 0.417  |
| 15   | H         | 0.058  | 0.062  |
| 16   | H         | 0.033  | 0.059  |
| 17   | H         | 0.030  | 0.034  |
| 18   | H         | -0.002 | 0.013  |
| 19   | H         | 0.111  | 0.090  |
| 20   | H         | 0.105  | 0.074  |
| 21   | H         | 0.077  | 0.066  |
| 22   | H         | 0.091  | 0.133  |
| 23   | H         | 0.072  | 0.113  |
| 24   | H         | 0.083  | 0.110  |

**b-** Morse Bond Parameters;  $\delta M(b) = D_M(1 - e^{-\mu(b-b_0)})^2$

| Bond Type  | $D_M$ | $b_0$ | $\mu$ |
|------------|-------|-------|-------|
| C1-O2      | 93.0  | 1.250 | 2.0   |
| C1-O3      | 93.0  | 1.250 | 2.0   |
| O3-C4 (TS) | 90.0  | 1.677 | 2.0   |
| C4-O5 (RS) | 93.0  | 1.250 | 2.0   |
| C4-O5 (TS) | 90.0  | 1.270 | 2.0   |
| C4-N6 (RS) | 93.9  | 1.400 | 2.0   |
| C4-N6 (TS) | 90.0  | 1.470 | 2.0   |

|              |       |       |     |
|--------------|-------|-------|-----|
| C7-N6        | 93.9  | 1.400 | 2.0 |
| C7-C8        | 96.0  | 1.540 | 0.8 |
| O13-H14 (RS) | 102.0 | 0.960 | 2.0 |
| O13-H14 (TS) | 90.0  | 1.057 | 2.0 |
| N6-H14 (TS)  | 90.0  | 1.517 | 2.0 |

c- Angle Parameters;  $V_{\theta}(\theta) = 1/2 k_{\theta}(\theta - \theta_0)^2$

| Angle type | $1/2 k_{\theta}$ | $\theta_0$ |
|------------|------------------|------------|
| C-N-C      | 50.0             | 109.5      |
| C-C-N      | 50.0             | 109.5      |
| N-C-O      | 50.0             | 120.0      |
| H-C-C      | 50.0             | 109.5      |
| H-C-H      | 50.0             | 109.5      |
| H-C-N      | 50.0             | 109.5      |
| O-C-O      | 50.0             | 120.0      |
| C-O-C      | 80.0             | 109.5      |
| O-C-C      | 50.0             | 120.0      |
| C-O-H (RS) | 80.0             | 109.5      |
| C-O-H (TS) | 50.0             | 120.0      |

d-. Dihedral parameters;  $V_{\varphi}(\varphi) = k_{\varphi}(1 + \cos(n\varphi - \varphi_0))$

| Dihedral Type | $k_{\varphi}$ | $n$ | $\varphi_0$ |
|---------------|---------------|-----|-------------|
| H-C-C-H       | 1.0           | 3.0 | 0.0         |
| O-C-N-C       | 15.0          | 2.0 | 180.0       |
| H-C-N-C       | 2.0           | 3.0 | 0.0         |
| C-N-C-C       | 2.0           | 3.0 | 0.0         |
| C-N-C-H       | 2.0           | 3.0 | 0.0         |
| N-C-C-H       | 2.0           | 3.0 | 0.0         |
| H-N-C-C       | 2.0           | 3.0 | 0.0         |
| H-N-C-H       | 2.0           | 3.0 | 0.0         |
| C-C-O-C       | 15.0          | 2.0 | 180.0       |
| O-C-O-C       | 15.0          | 2.0 | 180.0       |
| O-C-C-C       | 15.0          | 2.0 | 180.0       |

e-. Improper torsion parameters;  $V_\varphi(\varphi) = k_\varphi(1 + \cos(n\varphi - \varphi_0))$

| Dihedral Type | $k_\varphi$ | $n$ | $\varphi_0$ |
|---------------|-------------|-----|-------------|
| C-C-O-N       | 30.0        | 2   | 180.0       |
| C-C-C-C       | 30.0        | 2   | 180.0       |
| C-C-O-O       | 30.0        | 2   | 180.0       |
| N-C-C-C       | 30.0        | 2   | 180.0       |
| N-C-C-H       | 30.0        | 2   | 180.0       |

f- Nonbonded Parameters (EVB atom wise parameters for atoms bonded in one of the EVB states)

$$V_{nb} = \sqrt{C_A * C_B} e^{-\sqrt{\beta_A \beta_B} * r}$$

| Atom Type | $C$  | $\beta$ |
|-----------|------|---------|
| H0        | 5.0  | 2.5     |
| C+        | 91.0 | 2.5     |
| N+        | 60.0 | 2.5     |
| O0        | 53.0 | 2.5     |
| O-        | 90.0 | 2.5     |
| C0        | 91.0 | 2.5     |

g- Nonbonded Parameters (EVB atom wise parameters for atoms never bonded)

$$V_{nb} = \frac{vdwa_A * vdwa_B}{r^{12}} - \frac{vdwb_A * vdwb_B}{r^6}$$

| Atom Type | $vdwa$ | $vdwb$ |
|-----------|--------|--------|
| H0        | 7.0    | 0.0    |
| C+        | 632.0  | 24.0   |
| N+        | 774.0  | 24.0   |
| O0        | 774.0  | 24.0   |
| O-        | 1400.0 | 24.0   |
| C0        | 632.0  | 24.0   |

Other EVB parameters

gas shift 2,  $\alpha = -7.3$

## References

1. Warshel A, Weiss RM. An empirical valence bond approach for comparing reactions in solutions and in enzymes. *J Am Chem Soc* 1980;102:6218-6226.
2. Kamerlin SCL, Warshel A. The EVB as a quantitative tool for formulating simulations and analyzing biological and chemical reactions. *Faraday Discuss* 2010;145:71-106.
3. Kamerlin SC, Warshel A. The empirical valence bond model: theory and applications. *Wiley Interdisciplinary Reviews: Computational Molecular Science* 2011;1:30-45.
4. Zwanzig RW. High-temperature equation of state by a perturbation method. I. nonpolar gases. *J Chem Phys* 1954;22:1420-1426.
5. Warshel A, Chu, ZT, Villa J, Strajbl M, Schutz CN, Shurki A, Vicatos S, Plotnikov NV, Schopf P. *Molaris-XG*, v 9.15 Los Angeles: University of Southern California 2012.
6. Souza BS, Mora JR, Wanderlind EH, Clementin RM, Gesser JC, Fiedler HD, et al. Transforming a Stable Amide into a Highly Reactive One: Capturing the Essence of Enzymatic Catalysis. *Angew Chem Int Ed* 2017;56:5345-5348.
7. Lameira J, Kupchenko I, Warshel A. Enhancing paradynamics for QM/MM sampling of enzymatic reactions. *J Phys Chem B* 2016;120:2155-2164.
8. Frisch MJ, Trucks GW, Schlegel HB, Scuseria GE, Robb MA, Cheeseman JR, et al. *Gaussian 09: Revision D.01*; Gaussian, Inc.: Wallingford CT, 2009.
9. King G, Warshel A. Investigation of the free energy functions for electron transfer reactions. *J Chem Phys* 1990;93:8682-8692.
10. Lee FS, Warshel A. A local reaction field method for fast evaluation of long-range electrostatic interactions in molecular simulations. *J Chem Phys* 1992;97:3100-3107.
